# Supplementary material for: Determinants of smallholder’s farmers’ adoption of improved coffee varieties in southwest Ethiopia
Source: Research Square preprint supplement (doi:10.21203/rs.3.rs-7878627/v1), 2025-11-27
Supplement: Supplementary file 1 [file 3ddea55f8765f19fc3635cd8.docx]

**Appendix I – Questionnaire for data collection**

***Questionnaire for determinant of coffee production and improved coffee variety adoption***

Enumerator name----------------------------------- Date of interview___________

1. **Household characteristics (General Information of the respondent)**

- 1. Name of household head ______________________________________
  2. Sex of the household head 1. Female 2. Male
  3. Age of household head _____________________years
  4. Marital status of the household head 1. Single 2. Married 3. Divorced 4. Widowed
  5. Educational level of household head _____________________
  6. Family size: - 1. Male ____2. Female ____3. Total___________
  7. Major source of household income 1. Farm activities 2. Non-/off-farm activities
  8. Total land holding (ha)
  9. Total livestock owning; cattle--------------- sheep---------------goat ---------------chicken ------------
  10. Distance of your residence from the nearest market center: km
  11. Distance of your residence to the nearest FTC: --------------km
  12. Distance of your Kebele from Woreda center------KM
  13. Total annual of 2015/16---------------ETB, crop income ----------------ETB, livestock income ----------ETB, off-farm income---------------ETB, other (specify)--------------------------

1. **Coffee production**

2.1. Do you produce coffee 1. Yes 0. No

2.2. For how many years you have planted coffee _________years

2.3. Total land occupied by coffee plantation ________ hectare; garden coffee -------------- hectare semi-forest coffee-------------- hectare; plantation coffee ------------------------

2.4. Did you get any training regarding to coffee production packages? 1, yes 0, no

2.5. If your answer is yes; who give you training? 1. Agricultural office 2. Research center 3.NGO 4. Private investor 5. Other

2.6. if yes; how may time you got training --------------and on what title you got training?---------------------------------------------------------------------------

2.7. did you got credit service for coffee production? 1. Yes 0. No

2.8. what are the source of credit?------------------------------------------------------------------

2.9. does extension agent support you on coffee production? 1. Yes 0. No

2.10. If yes; what type of support you got from extension agent? --------------------------

2.11. How many time did you meet extension agent on coffee production per year? ------------

2.12. What type of seed did you used?

1, local 2, improved

2.113. If your answer for question is improved where you get the seed?

1. Agricultural office 2. Research center 3.NGO 4. Private investor 5. other

2.14. if you have improved coffee, list their variety? ----------------------------------------------------------------------------------------------

2.15. Fill the following table according to the age and area of coffee you own.

| Age of coffee | Area in hectare | | |
| --- | --- | --- | --- |
| Garden | Semi-forest | plantation |
| Less than 3 years |  |  |  |
| 3-5 years |  |  |  |
| 6-10 years |  |  |  |
| 10-15 years |  |  |  |
| Above 15 year |  |  |  |
| Stamped coffee |  |  |  |

- 1. Have you planted coffee in 2015? 1. Yes 0. No
  2. If yes how much area you planted --------------- hectare
  3. Do you have nursery for coffee seedling production 1. Yes 0. No
  4. If yes; what type of seed did you used? 1. Local 2. Improved
  5. where are you source of seed? 1. Woreda agr. Office 2. Own plantation 3. Neighbor coffee 4. Private investor 5. NGOs 6. Forest 7. Other spfy
  6. If don’t have nursery; where is your source of seedling? 1. Market 2. FTC nursery 3. Neighbor 4. Private investor 5. NGOs 6. Forest 7. Other spfy
  7. How many seedling you produced last year -----------------/ plot area------------m2
  8. How much seedling you planted ------------how much seedling you sold ----------- how much income you got from seedling sold----------------------ETB
  9. How was the trend of your coffee plantation area last 10 years? 1. Increasing 2. Decreasing 3. No change
  10. What is the reason -----------------------------------------------------------------------------------------------------------------------------------------------------------------------------------
  11. When does coffee (red cherry) harvested in your area (month)?-------------
  12. What type of coffee cherry you sold in 2015 and 2016 E.C? 1. Red cherry 2. Dried cherry 3. Both
  13. How was your coffee yield in 2015 and 2016 E.C.

| Age of coffee | **Yield in 2022/2023** | | | | **Yield in 2023/2024** | | | |
| --- | --- | --- | --- | --- | --- | --- | --- | --- |
| **Garden** | | **Semi forest** | | **Garden** | | **Semi-forest** | |
| red | dry | red | dry | red | dry | red | dry |
| Less than 3 years |  |  |  |  |  |  |  |  |
| 3-5 years |  |  |  |  |  |  |  |  |
| 6-10 years |  |  |  |  |  |  |  |  |
| 10-15 years |  |  |  |  |  |  |  |  |
| Above 15 year |  |  |  |  |  |  |  |  |
| Stamped coffee |  |  |  |  |  |  |  |  |

- 1. How was the trend of your coffee productivity last 10 years? 1. Increasing 2. Decreasing 3. No change
  2. What is the reason -----------------------------------------------------------------------------------------------------------------------------------------------------------------------------------

**3. Coffee management practice**

3.1. what kind of coffee management practice you practice to your coffee ? -----------------------------------------------------------------------------------------------------------------------------------------------------------------------------------------------------------------------------------

| Type of coffee | Weeding method  ***(code 1)*** | Weeding frequency | Intercropping 1. Yes 0. No | Plantation method 1. Row 2. Random | Pruning 1. Yes 0. No | Stamping 1. Yes 0. No | Shade tree plantation 1. Yes 0. No |
| --- | --- | --- | --- | --- | --- | --- | --- |
| Garden |  |  |  |  |  |  |  |
| Semi-forest |  |  |  |  |  |  |  |
| Plantation |  |  |  |  |  |  |  |
|  |  |  |  |  |  |  |  |

***code 1*** 1. Slashing 2. Chemical 3. Mulching 4. Hand weeding

3.2. What type of shade tree you used for your coffee? 1. Naturally existing 2. Temporary shade plantation 3. Permanent shade tree plantation 4. Both temporary& permanent shade tree plantation

3.3. Did you have old coffee plantation 1. Yes 0. No

3.4. If your answer is yes for question number above; what measure will you take to rehabilitate your coffee tree? 1. Stumping 2. Replacing with new coffee seedling 3. Replacing with other crop 4. Did nothing 5. Other specify –

3.5. did you intercrop coffee with other crop? 1.Yes 0. No

3.6. If you intercrop coffee with other crop; list the type of crops?----------------------------------------------

3.6. How much was the spacing of your coffee? 1/ Less than 1m by 1m 2/ Between 1m by 1m and 1.5m by 1.5m 3/ between 1.5m by 1.5m and 2m by 2m 4/ more than 2m by 2m

**4. Disease**

4.1. Does coffee disease occurred on your coffee plantation? 1. Yes 0. No

4.2. If yes what type of disease occur on your coffee plantation? 1. Coffee berry disease (CBD), 2. Coffee wilt disease (CWD), 3. Coffee leaf rust (CLR), 4. Bacterial blight of coffee (BBC) 5. Others specify

4.3. What control method you used 1. Did nothing 2.Used chemicals 3.Used resistance variety 4.Cultural control methods (Fumigation, uproot and burn, etc) 5. Replace the plot with other variety. 6. Replace the plot with other crop 7. Other, specify

4.4. What are indigenous and improved methods you used to prevent or control those diseases? ________________________________________________________________________________________________________________________________________________________________________________________________________________________________________________________

4.5. Is there a difference between varieties in response to Coffee wilt disease? 1. Yes 2. No

4.6. If yes for 2, list varieties from tolerant to susceptible. _________________________________

**5. Improved coffee varieties**

5.1 . Do you have used improved coffee varieties?

1. Yes 0.No

5.2. If yes; where did you get improved coffee variety 1. Agricultural office 2. Research center 3.NGO 4. Private investor 5. other

If yes list the varieties you planted-------------------------------------------------------------------

5.3. When you started using improved coffee varieties---------------

5.4. Did you get the coffee varieties you want in your locality?

1. Yes 2. No

5.5. Did you get the required amount coffee varieties on needed time in your interest?

1. Yes 2. No

5.6. How would you rate perceived attributes (advantage) of the improved coffee variety over the local varieties?

|  | Improved coffee varieties(*) | | | | | |
| --- | --- | --- | --- | --- | --- | --- |
| Criteria | 74110 | Gesha | K-one | Catimore | 74112 | Other |
| Yield advantage |  |  |  |  |  |  |
| Fast growth |  |  |  |  |  |  |
| Wider canopy cover |  |  |  |  |  |  |
| Early maturity of cherry |  |  |  |  |  |  |
| Consumer demand |  |  |  |  |  |  |
| Disease and insect pest resistance |  |  |  |  |  |  |
| Size of cherry |  |  |  |  |  |  |
| *Rate as 1. Very bad 2. Bad 3. Ok 4. Good 5. Very good | | | | | | |

5.7. Did you used fertilizer for your coffee farm?

1. Yes 2.No

5.8. If your answer for question number 18 is yes what type?

1. Organic 2. Inorganic 3.both

5.9. If your answer for question number is organic list their type, amount and frequency of application________________//__________________//__________________

5.10. If your answer for question number is inorganic list their type, amount and frequency of application________________//__________________//__________________

5.11. If your answer for question number is both list their type, amount and frequency of application________________//__________________//__________________

**6. Post-harvest handling**

6.1. What are the method harvesting you practiced?

1. Selective picking 2.Stripping 3. Collecting of failed cherries 4.Others

6.2.What type of processing method you used for your harvested coffee

1. washing 2. Drying the red cherries 3. Semi- washed 4. Both washing and drying

6.3. Which type of materials you can used for drying of cherries?

1. On ground 2. raised bed with bamboo sheet, 3.On cement land 4. On wire mesh bed

5. raised bed with straw, 6. Others, specify

6.4. Does red coffee cherries washing machinery (ቡና ማፍልፈያ) available in your area 1. Yes 0. No

6.5. If yes how much were the distance from your home?-----------km

Does dry coffee grinding machinery (ቡና መቀሸሪያ) available in your area 1. Yes 0. No

If yes how much were the distance from your home?-----------km

6.6. In what container you can store the dried coffee?

1. Sack (kasha) 2. Sack (madaberia) 3.Bag 4.plastick 5.Other

6.7. For how many months you store your coffee?----------------------------------------------

6.8. fill the following table about coffee product consumption and marketing

| Form of coffee sold | Market place ***code 1*** | Coffee consumed (quintal) | Quantity sold (quintal) | Average price (ETB/kg) | Source of price information ***code 2*** | Main Buyers ***code 3*** |
| --- | --- | --- | --- | --- | --- | --- |
| Red cherry |  |  |  |  |  |  |
| Dry coffee |  |  |  |  |  |  |
|  |  |  |  |  |  |  |

***Code 1;*** *1.**Farm gate 2. Village 3. District/ main market*

*Code 2; 1. BoA (extension agent) 2. Trader 3. Radio 4. Neighbor farmers 5. Others, specify*

***Code 3;*** *1. Farmer Union or Coop 2. Rural assembler 3. Rural trader 4. Broker/middlemen 5. Rural wholesaler 6. Urban trader 7. Urban wholesaler 8. Private coffee processor 9. Consumer or other farmer 10. Other, specify…….*

6.8. What are the major constraints of coffee production in your farm in their order of importance?--------------------------------------------------------------------------------------------------------------------------------------------------------------------------------------------

6.9. What are the main challenge in coffee marketing in your area in their order of importance?--------------------------------------------------------------------------------------------------------------------------------------------------------------------------------------------
